# Supplementary material for: Conformational transitions of the Spindly adaptor underlie its interaction with Dynein and Dynactin
Source: PubMed Central journal article supplement (PMC9481740; doi:10.1083/jcb.202206131), 2022-09-15

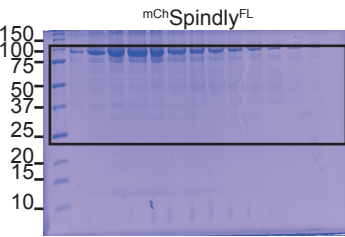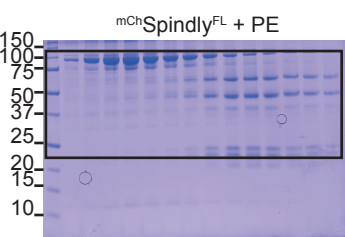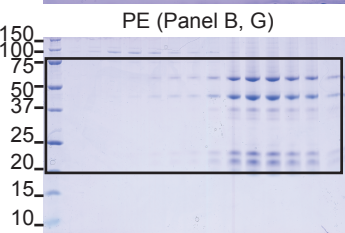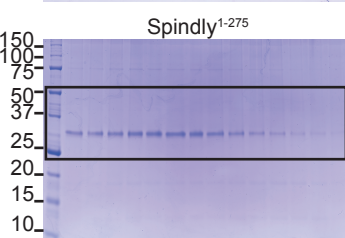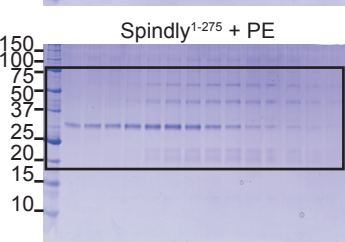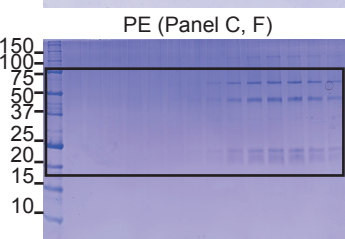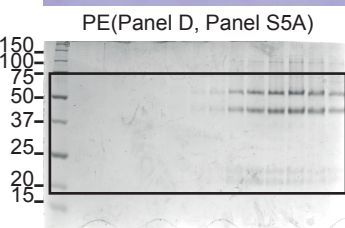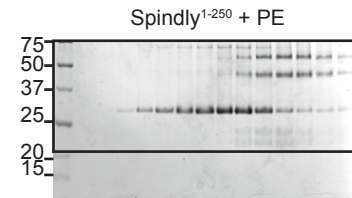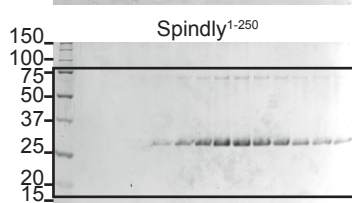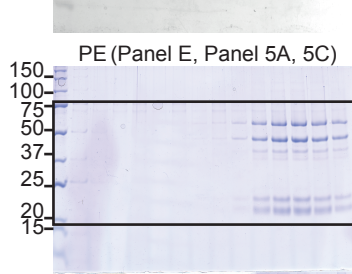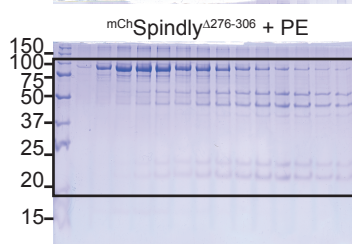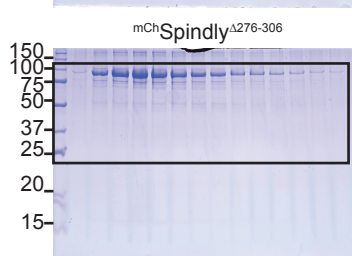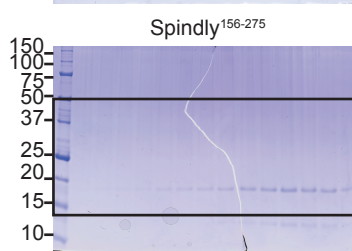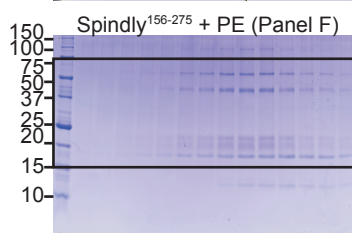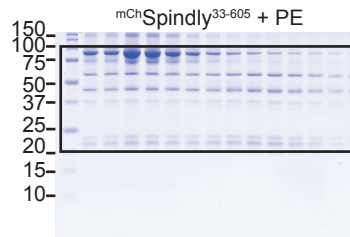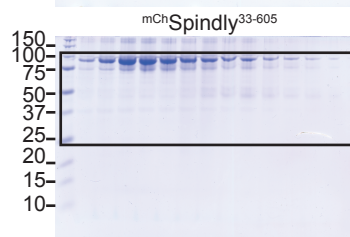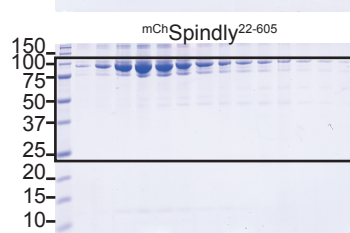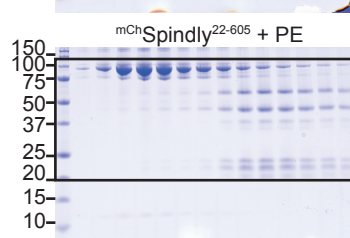

Supplement: JCB_202206131_SourceDataF3.pdf [file JCB_202206131_SourceDataF3.pdf]
