# Supplementary material for: Conformational transitions of the Spindly adaptor underlie its interaction with Dynein and Dynactin
Source: PubMed Central journal article supplement (PMC9481740; doi:10.1083/jcb.202206131), 2022-09-15

Panel A

Panel A

<sup>PB</sup>Dynactin (Panel C)<sup>R</sup>Dynactin (Panel C)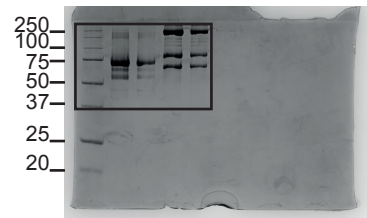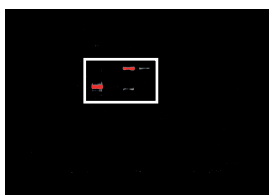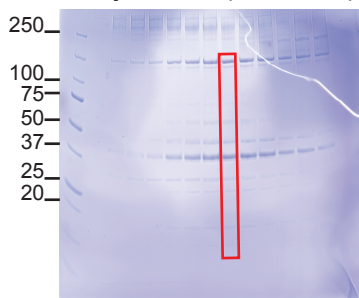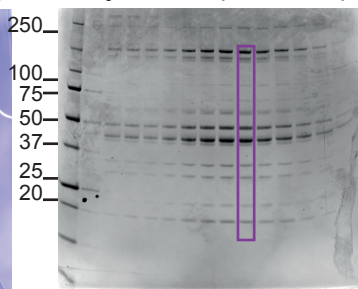<sup>R</sup>Dynactin + Dynein<sup>1-1455</sup> + BicD2<sup>1-400</sup> (Panel F)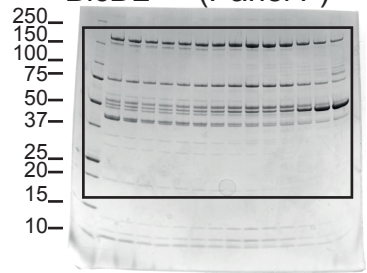<sup>R</sup>Dynactin + Dynein<sup>1-1455</sup> + Spindly<sup>F</sup> (Panel G)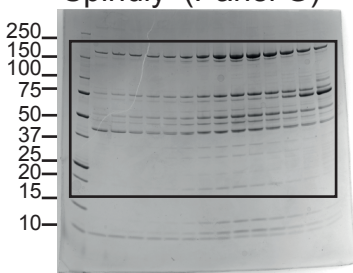<sup>R</sup>Dynactin + Dynein<sup>1-1455</sup> + <sup>P</sup>RZZ + <sup>P</sup>Spindly<sup>F</sup> (Panel I)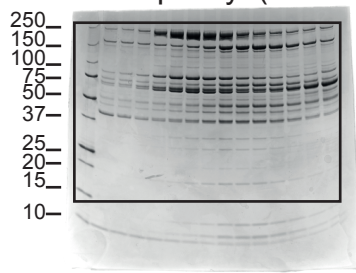BICD2<sup>1-400</sup> (Panel F)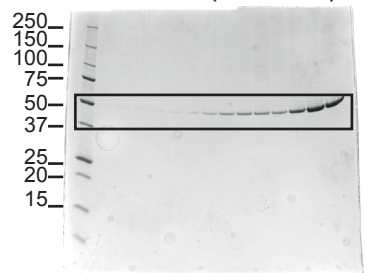Spindly<sup>F</sup> (Panel G)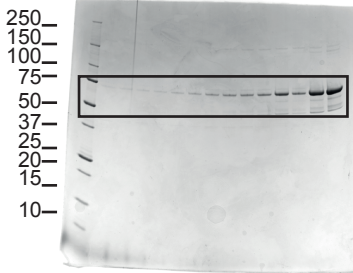<sup>P</sup>RZZ + <sup>P</sup>Spindly<sup>F</sup> (Panel I)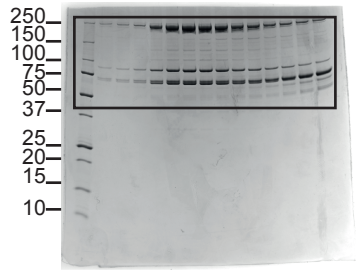<sup>R</sup>Dynactin (Panel F-I)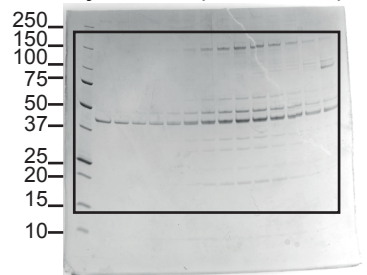<sup>R</sup>Dynactin + Dynein<sup>1-1455</sup> + <sup>D</sup>RZZ + <sup>D</sup>Spindly<sup>F</sup> (Panel H)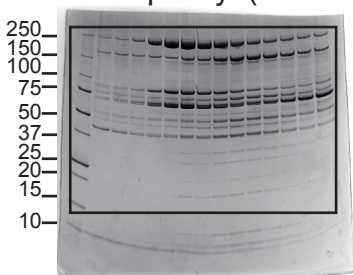Dynein<sup>1-1455</sup> (Panel F-I)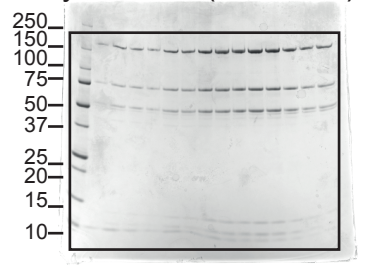<sup>D</sup>RZZ + <sup>D</sup>Spindly<sup>F</sup> (Panel H)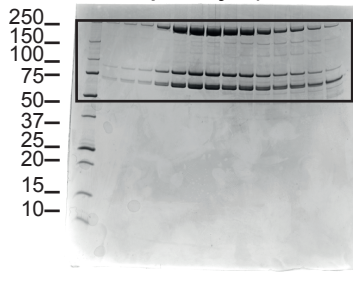

Supplement: JCB_202206131_SourceDataFS4.pdf [file JCB_202206131_SourceDataFS4.pdf]
