# Supplementary material for: Conformational transitions of the Spindly adaptor underlie its interaction with Dynein and Dynactin
Source: PubMed Central journal article supplement (PMC9481740; doi:10.1083/jcb.202206131), 2022-09-15

Spindly<sup>1-354</sup> + PE (Panel A)

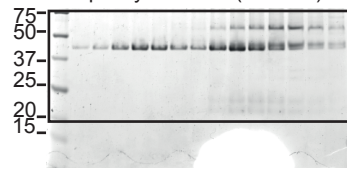

PE (Panel B, Panel S5A, Panel S5B)

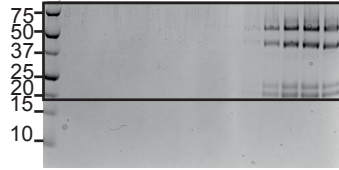

mCh<sup>Spindly</sup><sup>Δ26-28</sup> (Panel C)

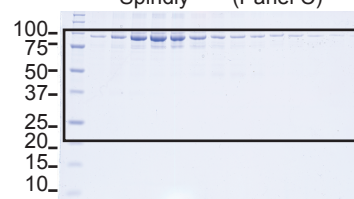

Spindly<sup>1-354</sup> (Panel A)

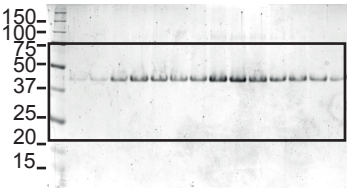

mCh<sup>Spindly</sup><sup>76-605</sup> (Panel B)

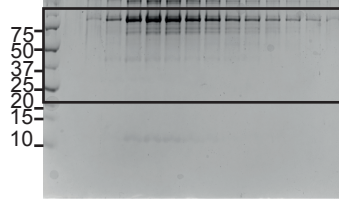

mCh<sup>Spindly</sup><sup>Δ26-28</sup> + PE (Panel C)

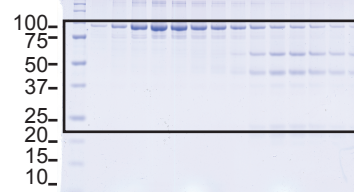

Spindly<sup>1-440</sup> (Panel A)

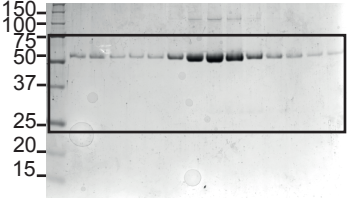

mCh<sup>Spindly</sup><sup>76-605</sup> + PE (Panel B)

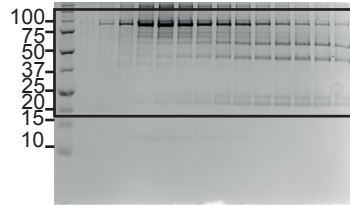

mCh<sup>Spindly</sup><sup>Δ26-32</sup> + PE (Panel D)

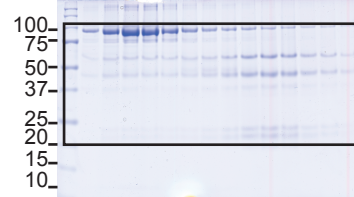

Spindly<sup>1-440</sup> + PE (Panel A)

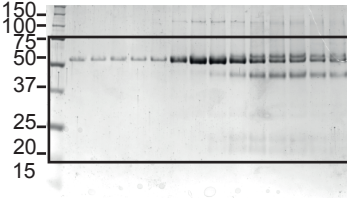

PE (Panel C, D)

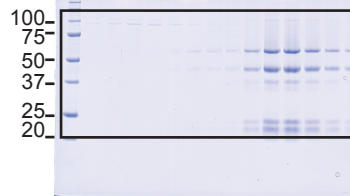

mCh<sup>Spindly</sup><sup>Δ26-32</sup> (Panel D)

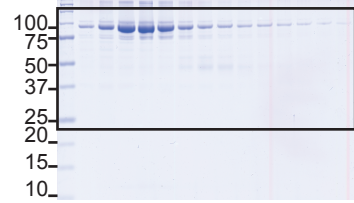

Supplement: JCB_202206131_SourceDataFS5.pdf [file JCB_202206131_SourceDataFS5.pdf]
