# Supplementary material for: Conformational transitions of the Spindly adaptor underlie its interaction with Dynein and Dynactin
Source: PubMed Central journal article supplement (PMC9481740; doi:10.1083/jcb.202206131), 2022-09-15

# Source Data FS7 B

IB: Spindly

mCherry FL  $\Delta$ 32 CC2\* Chimera

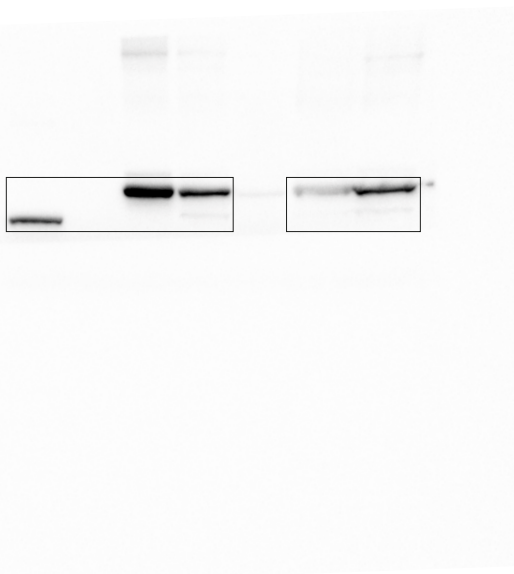

IB: Tubulin

mCherry FL  $\Delta$ 32 CC2\* Chimera

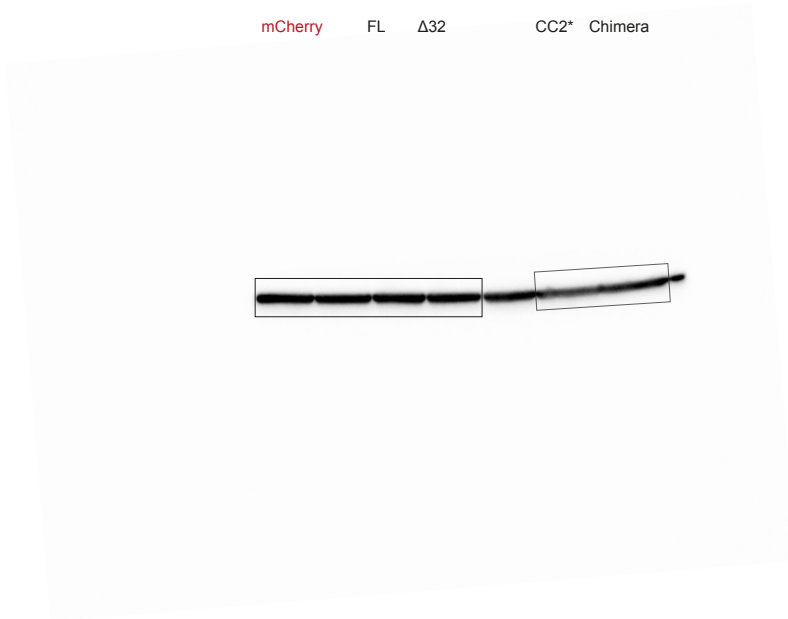

Merge of colorimetric + IB: Spindly

mCherry FL  $\Delta$ 32 CC2\* Chimera

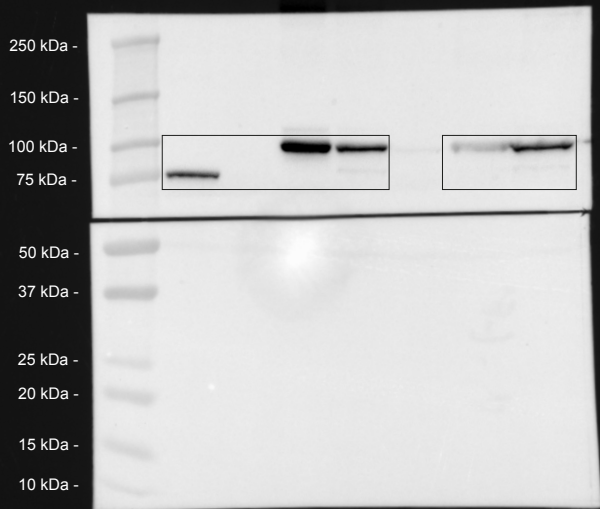

Merge of colorimetric + IB: Tubulin

mCherry FL  $\Delta$ 32 CC2\* Chimera

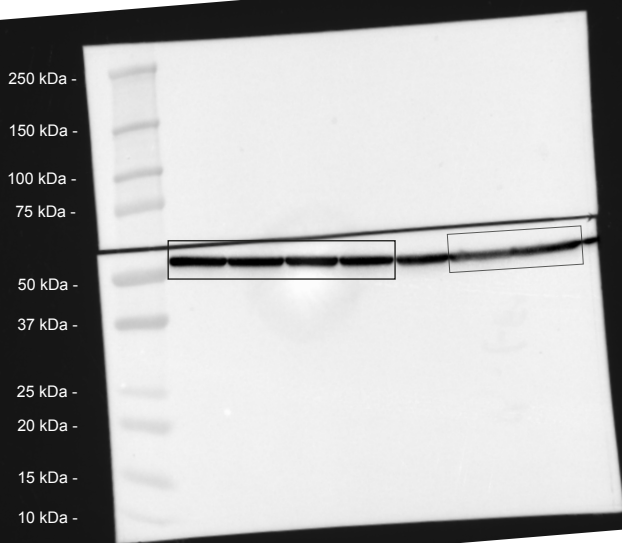

Supplement: JCB_202206131_SourceDataFS7.pdf [file JCB_202206131_SourceDataFS7.pdf]
